# Supplementary material
Source: Springer Nature journal article supplement (https://www.springermedizin.de/resource/supplementary/12913_2009_1033_MOESM2_ESM.pdf/9536180)
Supplement: MOESM2 [file 9536180]

| Aims                                                                                                                                                                                                                                                                                                                                                                           | Phases                                                                                                                                                                                                                                         | Objectives                                                                                                                                                                                                                                                                                                                                                                                                                                                                                                                                                                                         | Methods                                                                                                                                                                                                                                                                                                                                                                                                                                                                                                                                                                                                                                                    | Outcomes                                                                                                                                                                                                                                                                                                                                                                                                                                                                                                                                 |
|--------------------------------------------------------------------------------------------------------------------------------------------------------------------------------------------------------------------------------------------------------------------------------------------------------------------------------------------------------------------------------|------------------------------------------------------------------------------------------------------------------------------------------------------------------------------------------------------------------------------------------------|----------------------------------------------------------------------------------------------------------------------------------------------------------------------------------------------------------------------------------------------------------------------------------------------------------------------------------------------------------------------------------------------------------------------------------------------------------------------------------------------------------------------------------------------------------------------------------------------------|------------------------------------------------------------------------------------------------------------------------------------------------------------------------------------------------------------------------------------------------------------------------------------------------------------------------------------------------------------------------------------------------------------------------------------------------------------------------------------------------------------------------------------------------------------------------------------------------------------------------------------------------------------|------------------------------------------------------------------------------------------------------------------------------------------------------------------------------------------------------------------------------------------------------------------------------------------------------------------------------------------------------------------------------------------------------------------------------------------------------------------------------------------------------------------------------------------|
| <p><b>Overarching aim:</b><br/>Realise a scientific innovation of major national and international importance.</p> <p><b>Specific aims:</b><br/>Develop and design, test in the field, and then refine, simulate and apply a framework, model and tools which can be used to evaluate communities of practice and social networks for their efficiency and sustainability.</p> | <p><b>Phase 1:</b><br/>development and design phase.</p> <p><b>Phase 2:</b> testing and refinement phase.</p> <p><b>Phase 3:</b><br/>simulation and prediction phase.</p> <p><b>Phase 4:</b><br/>application and outcome assessment phase.</p> | <p><b>Objective one:</b><br/>develop framework;</p> <p><b>Objective two:</b><br/>design initial evaluation model and tools;</p> <p><b>Objective three:</b><br/>test the methods and tools;</p> <p><b>Objective four:</b><br/>refine tools and procedures;</p> <p><b>Objective five:</b><br/>construct model using simulation tools;</p> <p><b>Objective six:</b> test the models' capacity for prediction;</p> <p><b>Objective seven:</b><br/>apply the framework, model and tools in a large sample;</p> <p><b>Objective eight:</b><br/>review project work, deliverables, data and findings.</p> | <p><b>Objective one:</b><br/>theoretical and empirical analysis;</p> <p><b>Objective two:</b><br/>construction of tools via extant literature;</p> <p><b>Objective three:</b><br/>field application of methods, tools;</p> <p><b>Objective four:</b><br/>validity, reliability procedures;</p> <p><b>Objective five:</b><br/>create systems dynamics model via software;</p> <p><b>Objective six:</b><br/>testing of models against real world behaviours;</p> <p><b>Objective seven:</b><br/>field test methods; application of tools in field sample;</p> <p><b>Objective eight:</b><br/>review and audit; develop papers, and project finalisation.</p> | <ol style="list-style-type: none"> <li>1. Evaluation framework and principles</li> <li>2. Evaluation model tested and refined</li> <li>3. Data gathering tools with measures of reliability and validity</li> <li>4. Predictive systems dynamics model</li> <li>5. Method for developing triangulated assessment of complex social phenomenon</li> <li>5. Transferable method and approach suitable with modification for other sectors</li> <li>6. Contribution to research fields, potential contribution to export income.</li> </ol> |
